# Supplementary material
Source: PubMed Central journal article supplement (PMC6105853)
Supplement: zac007187297s1.pdf [file zac007187297s1.pdf]

## Supplementary material

### 1. Methods for determination of minimal inhibitory concentration (MIC), Minimal biofilm inhibitory concentration (MBIC) and Biofilm preventive concentration (BPC)

The MIC of a stationary-phase planktonic culture was determined by plating different dilutions of the 48h culture on LB plates with different CIP concentrations. The CIP concentration that decreases the size of the population by  $\geq 2$  logs was considered the MIC of the stationary-phase population.

The MBIC of CIP for PAO1 colony-biofilms was determined by growing the bacteria for 48 hours on a membrane, as previously described, to form colony- biofilms and transferring the membranes on LB plates with different CIP concentration. The colony biofilms were dispersed after 48 h of incubation and the CFUs/ml of the surviving populations were counted. The CIP concentration that caused a reduction of the biofilm population by  $\geq 2$  logs was considered the MBIC.

The biofilm preventive concentration of CIP for PAO1 colony-biofilm was determined by establishing colony-biofilms on polycarbonate membranes placed on LB plates containing increasing CIP concentrations. The CIP concentration that prevented biofilm formation was considered the BPC.

Table S1. Percentage of population recovered from plates with 0.5 mg/L CIP (A), 1 mg/L CIP (B) and 2 mg/L CIP (C) from CIP-evolved biofilm and planktonic populations during passages (P0 to P6) of the experimental evolution. Mean and SEM of eight lineages are presented.

A.

|           | CIP_Biofilm (%<br>population recovered<br>from 0.5 mg/L) |       | CIP_Planktonic (%<br>population recovered<br>from 0.5 mg/L) |        |
|-----------|----------------------------------------------------------|-------|-------------------------------------------------------------|--------|
|           | Mean                                                     | SEM   | Mean                                                        | SEM    |
| <b>P0</b> | 0.026                                                    | 0.010 | 1.077                                                       | 0.653  |
| <b>P1</b> | 18.00                                                    | 10.31 | 0.8759                                                      | 0.4221 |
| <b>P2</b> | 17.62                                                    | 6.982 | 2.832                                                       | 0.8542 |
| <b>P3</b> | 11.35                                                    | 3.338 | 13.00                                                       | 9.561  |
| <b>P4</b> | 13.37                                                    | 4.444 | 4.567                                                       | 3.178  |
| <b>P5</b> | 12.77                                                    | 4.124 | 3.494                                                       | 1.515  |
| <b>P6</b> | 60.45                                                    | 21.96 | 17.85                                                       | 4.785  |

B.

|           | CIP_Biofilm ((% population recovered from 1 mg/L) |       | CIP_Planktonic (% population recovered from 1mg/L) |          |
|-----------|---------------------------------------------------|-------|----------------------------------------------------|----------|
|           | Mean                                              | SEM   | Mean                                               | SEM      |
| <b>P0</b> | 0.007                                             | 0.003 | 0.089                                              | 0.088    |
| <b>P1</b> | 2.814                                             | 2.572 | 0.013                                              | 0.011    |
| <b>P2</b> | 3.706                                             | 2.454 | 0.086                                              | 0.086    |
| <b>P3</b> | 0.051                                             | 0.045 | 0.012                                              | 0.011    |
| <b>P4</b> | 0.559                                             | 0.365 | 0.179                                              | 0.167    |
| <b>P5</b> | 0.578                                             | 0.358 | 0.005                                              | 0.003898 |
| <b>P6</b> | 1.104                                             | 0.429 | 0.083                                              | 0.0828   |

C.

|           | CIP_Biofilm (% population recovered from 2 mg/L) |         | CIP_Planktonic (% population recovered from 2 mg/L) |         |
|-----------|--------------------------------------------------|---------|-----------------------------------------------------|---------|
|           | Mean                                             | SEM     | Mean                                                | SEM     |
| <b>P0</b> | 0.0004                                           | ± 0.000 | 0.0000243                                           | ± 0.000 |
| <b>P1</b> | 0.0300                                           | ± 0.020 | 0.0000148                                           | ± 0.000 |
| <b>P2</b> | 0.0200                                           | ± 0.016 | 0.0000000                                           | ± 0.000 |
| <b>P3</b> | 0.0000329                                        | ± 0.000 | 0.0000016                                           | ± 0.000 |
| <b>P4</b> | 0.0030                                           | ± 0.003 | 0.0000018                                           | ± 0.000 |
| <b>P5</b> | 0.00008                                          | ± 0.000 | 0.0000002                                           | ± 0.000 |
| <b>P6</b> | 0.1020                                           | ± 0.404 | 0.0000032                                           | ± 0.000 |

Table S2. Percentage of population recovered from plates with 0.5 mg/L CIP from CTRL-evolved biofilm during passages (P0 to P6) of the experimental evolution. Mean and SEM of eight lineages are presented.

|           | <b>CTRL_Biofilm (%<br/>population recovered from<br/>0.5 mg/L)</b> |                        |
|-----------|--------------------------------------------------------------------|------------------------|
|           | <b>Mean</b>                                                        | <b>SEM</b>             |
| <b>P0</b> | 37 X10 <sup>-5</sup>                                               | ± 18 X10 <sup>-5</sup> |
| <b>P1</b> | 16 X10 <sup>-4</sup>                                               | ± 90 X10 <sup>-5</sup> |
| <b>P2</b> | 97 X10 <sup>-5</sup>                                               | ± 15 X10 <sup>-5</sup> |
| <b>P3</b> | 15 X10 <sup>-4</sup>                                               | ± 55 X10 <sup>-5</sup> |
| <b>P4</b> | 15 X10 <sup>-4</sup>                                               | ± 64 X10 <sup>-5</sup> |
| <b>P5</b> | 15 X10 <sup>-4</sup>                                               | ± 35 X10 <sup>-5</sup> |
| <b>P6</b> | 85 X10 <sup>-4</sup>                                               | ± 41 X10 <sup>-4</sup> |

Table S3. The minimum inhibitory concentrations (MICs) of ciprofloxacin (CIP) for selected colonies recovered from each CIP lineage (A. B. C. D) from three evolution experiments (I. II and III) at different passages (P0 to P6). The colonies were selected from 1 and 2 mg/L CIP. The highlighted rows represent the colonies recovered from the lineages used for sequence of the bacterial populations.

| Biofilm<br>CIP lineage_passage no. (Colony<br>no.)_Experiment no._selected<br>concentration | Biofilm_CIP MIC<br>(mg/L) | Planktonic<br>CIP lineage_passage no. (Colony<br>no.)_Experiment no._selected<br>concentration | Planktonic_CIP MIC<br>(mg/L) |
|---------------------------------------------------------------------------------------------|---------------------------|------------------------------------------------------------------------------------------------|------------------------------|
| A0 (1)_III_2 mg/L                                                                           | 1,5                       | A0 (1)_I_2 mg/L                                                                                | 2                            |
| A0 (2)_III_2 mg/L                                                                           | 1                         | A0 (2)_I_2 mg/L                                                                                | 6                            |
| A0 (3)_III_2 mg/L                                                                           | 1,5                       | A0 (3)_I_2 mg/L                                                                                | 6                            |
| B0 (1)_III_2 mg/L                                                                           | 2                         | B0 (1)_I_1 mg/L                                                                                | 1,5                          |
| B0 (2)_III_2 mg/L                                                                           | 1,5                       | B0 (2)_I_1 mg/L                                                                                | 1                            |
| B0 (3)_III_2 mg/L                                                                           | 2                         | B0 (3)_I_1 mg/L                                                                                | 0,5                          |
| C0 (1)_III_2 mg/L                                                                           | 0,5                       | C0 (1)_I_1 mg/L                                                                                | 1                            |
| C0 (2)_III_2 mg/L                                                                           | 1                         | C0 (2)_I_1 mg/L                                                                                | 1                            |
| C0 (3)_III_2 mg/L                                                                           | 1                         | C0 (3)_I_1 mg/L                                                                                | 1                            |
| D0 (1)_III_2 mg/L                                                                           | 1,5                       | D0 (1)_I_1 mg/L                                                                                | 8                            |
| D0 (2)_III_2 mg/L                                                                           | 1                         | D0 (2)_I_1 mg/L                                                                                | 1,5                          |
| D0 (3)_III_2 mg/L                                                                           | 1,5                       | D0 (3)_I_1 mg/L                                                                                | 32                           |
| A0 (1)_I_1 mg/L                                                                             | 4                         | A0 (1)_II_1 mg/L                                                                               | 3                            |
| A0 (2)_I_1 mg/L                                                                             | 3                         | A0 (2)_II_1 mg/L                                                                               | 1                            |
| A0 (3)_I_1 mg/L                                                                             | 1                         | A0 (3)_II_1 mg/L                                                                               | 3                            |
| B0 (1)_II_1 mg/L                                                                            | 1,5                       | C0 (1)_II_1 mg/L                                                                               | 2                            |
| B0 (2)_II_1 mg/L                                                                            | 1,5                       | C0 (2)_II_1 mg/L                                                                               | 3                            |
| B0 (3)_II_1 mg/L                                                                            | 1,5                       | C0 (3)_II_1 mg/L                                                                               | 1,5                          |
| D0 (1)_II_1 mg/L                                                                            | 1,5                       | D0 (1)_II_1 mg/L                                                                               | 2                            |
| D0 (2)_II_1 mg/L                                                                            | 1,5                       | D0 (2)_II_1 mg/L                                                                               | 32                           |
| D0 (3)_II_1 mg/L                                                                            | 2                         | D0 (3)_II_1 mg/L                                                                               | 8                            |
| B1 (1)_III_1 mg/L                                                                           | 1,5                       | A1 (1)_I_2 mg/L                                                                                | 4                            |
| B1 (2)_III_1 mg/L                                                                           | 0,75                      | A1 (2)_I_2 mg/L                                                                                | 4                            |
| B1 (3)_III_1 mg/L                                                                           | 1,5                       | B1 (1)_I_2 mg/L                                                                                | 1,5                          |
| C1 (1)_III_1 mg/L                                                                           | 1                         | B1 (2)_I_2 mg/L                                                                                | 1,5                          |
| C1 (2)_III_1 mg/L                                                                           | 1,5                       | D1 (1)_I_2 mg/L                                                                                | 0,38                         |
| C1 (3)_III_1 mg/L                                                                           | 1                         | D1 (2)_I_2 mg/L                                                                                | 0,125                        |
| B2 (1)_III_1 mg/L                                                                           | 2                         | A2 (1)_I_2 mg/L                                                                                | 2                            |
| C2 (1)_III_1 mg/L                                                                           | 1,5                       | A2 (2)_I_2 mg/L                                                                                | 1                            |
| C2 (2)_III_1 mg/L                                                                           | 1                         | A2 (3)_I_2 mg/L                                                                                | 1,5                          |
| C2 (3)_III_1 mg/L                                                                           | 1,5                       | B2 (1)_I_2 mg/L                                                                                | 4                            |
| D2 (1)_III_1 mg/L                                                                           | 2                         | B2 (2)_I_2 mg/L                                                                                | 3                            |
| D2 (2)_III_1 mg/L                                                                           | 1                         | C2 (1)_I_2 mg/L                                                                                | 0,5                          |
| .....                                                                                       | .....                     | D2 (1)_I_2 mg/L                                                                                | 3                            |
| .....                                                                                       | .....                     | D2 (2)_I_2 mg/L                                                                                | 3                            |
| A3 (3)_III_1 mg/L                                                                           | 0,75                      | A3 (1)_I_2 mg/L                                                                                | 0,5                          |
| B3 (1)_III_1 mg/L                                                                           | 1                         | A3 (2)_I_2 mg/L                                                                                | 3                            |
| B3 (2)_III_1 mg/L                                                                           | 2                         | B3 (1)_I_2 mg/L                                                                                | 32                           |
| B3 (3)_III_1 mg/L                                                                           | 1,5                       | B3 (2)_I_2 mg/L                                                                                | 32                           |
| C3 (1)_III_1 mg/L                                                                           | 0,75                      | C3 (1)_I_2 mg/L                                                                                | 12                           |
| C3 (2)_III_1 mg/L                                                                           | 1                         | C3 (2)_I_2 mg/L                                                                                | 8                            |
| C3 (3)_III_1 mg/L                                                                           | 1                         | D3 (1)_I_2 mg/L                                                                                | 0,25                         |
| A4 (1)_III_1 mg/L                                                                           | 2                         | A4 (1)_I_2 mg/L                                                                                | 2                            |
| B4 (1)_III_1 mg/L                                                                           | 1,5                       | A4 (2)_I_2 mg/L                                                                                | 2                            |
| B4 (2)_III_1 mg/L                                                                           | 1                         | B4 (1)_I_2 mg/L                                                                                | 2                            |
| B4 (3)_III_1 mg/L                                                                           | 1                         | B4 (2)_I_2 mg/L                                                                                | 3                            |
| D4 (1)_III_1 mg/L                                                                           | 2                         | C4 (1)_I_2 mg/L                                                                                | 4                            |
| D4 (2)_III_1 mg/L                                                                           | 0,75                      | C4 (2)_I_2 mg/L                                                                                | 6                            |
| D4 (3)_III_1 mg/L                                                                           | 2                         | D4 (1)_I_2 mg/L                                                                                | 0,5                          |
| .....                                                                                       | .....                     | D4 (2)_I_2 mg/L                                                                                | 0,5                          |
| A5 (1)_III_1 mg/L                                                                           | 1                         | A5 (1)_I_2 mg/L                                                                                | 4                            |
| B5 (1)_III_1 mg/L                                                                           | 1                         | A5 (2)_I_2 mg/L                                                                                | 2                            |
| B5 (2)_III_1 mg/L                                                                           | 1,5                       | B5 (1)_I_2 mg/L                                                                                | 0,75                         |
| B5 (3)_III_1 mg/L                                                                           | 0,75                      | B5 (2)_I_2 mg/L                                                                                | 0,75                         |
| C5 (1)_III_1 mg/L                                                                           | 6                         | B5 (3)_I_2 mg/L                                                                                | 3                            |
| D5 (1)_III_1 mg/L                                                                           | 4                         | C5 (1)_I_2 mg/L                                                                                | 0,75                         |
| D5 (2)_III_1 mg/L                                                                           | 1,5                       | C5 (2)_I_2 mg/L                                                                                | 2                            |
| D5 (3)_III_1 mg/L                                                                           | 3                         | D5 (1)_I_2 mg/L                                                                                | 6                            |
| .....                                                                                       | .....                     | D5 (2)_I_2 mg/L                                                                                | 6                            |
| A6 (1)_III_2 mg/L                                                                           | 2                         | A6 (1)_I_1 mg/L                                                                                | 0,75                         |
| A6 (2)_III_2 mg/L                                                                           | 4                         | A6 (2)_I_1 mg/L                                                                                | 1                            |
| A6 (3)_III_2 mg/L                                                                           | 2                         | A6 (3)_I_1 mg/L                                                                                | 0,094                        |
| B6 (1)_III_2 mg/L                                                                           | 1,5                       | B6 (1)_I_2 mg/L                                                                                | 32                           |
| B6 (2)_III_2 mg/L                                                                           | 6                         | B6 (2)_I_2 mg/L                                                                                | 32                           |
| B6 (3)_III_2 mg/L                                                                           | 1,5                       | B6 (1)_I_1 mg/L                                                                                | 6                            |
| C6 (1)_III_2 mg/L                                                                           | 2                         | C6 (1)_I_2 mg/L                                                                                | 8                            |
| C6 (2)_III_2 mg/L                                                                           | 3                         | C6 (2)_I_2 mg/L                                                                                | 4                            |
| C6 (3)_III_2 mg/L                                                                           | 1,5                       | C6 (3)_I_2 mg/L                                                                                | 12                           |
| D6 (1)_III_2 mg/L                                                                           | 3                         | D6 (1)_I_1 mg/L                                                                                | 1                            |
| D6 (2)_III_2 mg/L                                                                           | 1                         | D6 (2)_I_1 mg/L                                                                                | 1                            |
| D6 (3)_III_2 mg/L                                                                           | 1                         | D6 (3)_I_1 mg/L                                                                                | 1,5                          |
| A6 (3)_I_2 mg/L                                                                             | 3                         | A6 (1)_II_2 mg/L                                                                               | 8                            |
| A6 (4)_I_2 mg/L                                                                             | 4                         | A6 (2)_II_2 mg/L                                                                               | 8                            |
| A6 (5)_I_2 mg/L                                                                             | 1,5                       | A6 (3)_II_2 mg/L                                                                               | 16                           |
| A6 (1)_II_2 mg/L                                                                            | 4                         | B6 (1)_II_2 mg/L                                                                               | 2                            |
| A6 (2)_II_2 mg/L                                                                            | 1,5                       | B6 (2)_II_2 mg/L                                                                               | 2                            |
| A6 (3)_II_2 mg/L                                                                            | 3                         | B6 (3)_II_2 mg/L                                                                               | 1,5                          |
| B6 (1)_II_2 mg/L                                                                            | 6                         | C6 (1)_II_2 mg/L                                                                               | 32                           |
| B6 (2)_II_1 mg/L                                                                            | 2                         | C6 (2)_II_2 mg/L                                                                               | 3                            |
| B6 (3)_II_1 mg/L                                                                            | 6                         | C6 (3)_II_2 mg/L                                                                               | 32                           |
| D6 (1)_II_2 mg/L                                                                            | 4                         | D6 (1)_II_2 mg/L                                                                               | 4                            |
| D6 (2)_II_2 mg/L                                                                            | 1,5                       | D6 (2)_II_2 mg/L                                                                               | 2                            |
| D6 (3)_II_2 mg/L                                                                            | 1                         | D6 (3)_II_2 mg/L                                                                               | 3                            |

Table S4: Mean coverage of the genome sequencing and the number of non-synonymous mutations in each sequenced evolved population. CTRL control (evolved in the absence of antibiotic). CIP evolved in the presence of 0.1 mg/L CIP.

| <b>CTRL Populations</b> | <b>Coverage</b> | <b>Non-synonymous mutations (number)</b> | <b>CIP populations</b> | <b>Coverage</b> | <b>Non-synonymous mutations (number)</b> |
|-------------------------|-----------------|------------------------------------------|------------------------|-----------------|------------------------------------------|
| CTRL_Biofilm A          | 84.15           | 9                                        | CIP_Biofilm A          | 107.16          | 5                                        |
| CTRL_Biofilm B          | 92.83           | 3                                        | CIP_Biofilm B          | 91.42           | 11                                       |
| CTRL_Biofilm C          | 90.06           | 7                                        | CIP_Biofilm C          | 77.63           | 20                                       |
| CTRL_Biofilm D          | 122.52          | 2                                        | CIP_Biofilm D          | 84.71           | 17                                       |
| CTRL_Planktonic A       | 72.17           | 9                                        | CIP_Planktonic A       | 105.68          | 8                                        |
| CTRL_Planktonic B       | 91.88           | 5                                        | CIP_Planktonic B       | 91.04           | 9                                        |
| CTRL_Planktonic C       | 122.14          | 7                                        | CIP_Planktonic C       | 113.22          | 5                                        |
| CTRL_Planktonic D       | 89.98           | 9                                        | CIP_Planktonic D       | 151.03          | 15                                       |

Table S5. The list of SNPs in the evolved bacterial populations from control (CTRL) and CIP-evolved (CIP) planktonic and biofilm cultures. The gene name, function, the lineage, the frequency as well as the nucleotide and amino acid changes are presented. Fs frameshift

Supplementary file 2.

TableS6. Twitching motility (mm) of 40 colonies collected from the four lineages (A. B. C. D) of the evolved biofilm and planktonic populations in the presence of sub-inhibitory concentrations of CIP (CIP) or in the control (CTRL) evolved populations. Twitching motility was investigated according to previously described method (1).

| Lineage                  | Colony number | 1  | 2  | 3  | 4  | 5  | 6  | 7  | 8  | 9  | 10 |
|--------------------------|---------------|----|----|----|----|----|----|----|----|----|----|
| <b>CTRL A_Biofilm</b>    |               | 36 | 41 | 42 | 43 | 38 | 42 | 42 | 36 | 43 | 45 |
| <b>CTRL B_Biofilm</b>    |               | 56 | 54 | 58 | 56 | 56 | 58 | 55 | 51 | 59 | 51 |
| <b>CTRL C_Biofilm</b>    |               | 39 | 35 | 40 | 38 | 41 | 39 | 39 | 44 | 41 | 42 |
| <b>CTRL D_Biofilm</b>    |               | 53 | 53 | 57 | 59 | 54 | 60 | 48 | 50 | 59 | 60 |
| <b>CTRL A_Planktonic</b> |               | 37 | 38 | 32 | 33 | 32 | 44 | 47 | 45 | 43 | 51 |
| <b>CTRL B_Planktonic</b> |               | 34 | 42 | 39 | 33 | 39 | 38 | 37 | 42 | 35 | 39 |
| <b>CTRL C_Planktonic</b> |               | 44 | 53 | 45 | 55 | 55 | 51 | 44 | 49 | 53 | 55 |
| <b>CTRL D_Planktonic</b> |               | 53 | 47 | 56 | 47 | 46 | 54 | 45 | 50 | 46 | 54 |
| <b>CIP A_Biofilm</b>     |               | 0  | 0  | 0  | 0  | 0  | 0  | 0  | 0  | 0  | 0  |
| <b>CIP B_Biofilm</b>     |               | 0  | 0  | 0  | 0  | 0  | 0  | 0  | 0  | 0  | 0  |
| <b>CIP C_Biofilm</b>     |               | 15 | 26 | 24 | ND | 18 | 22 | 22 | 25 | 27 | 25 |
| <b>CIP D_Biofilm</b>     |               | 0  | 0  | 0  | 0  | 0  | 0  | 0  | 0  | 0  | 0  |
| <b>CIP A_Planktonic</b>  |               | 48 | 42 | 48 | 0  | 42 | 36 | 48 | 25 | 32 | 29 |
| <b>CIP B_Planktonic</b>  |               | 0  | 0  | 0  | 0  | 0  | 0  | 0  | 0  | 0  | 0  |
| <b>CIP C_Planktonic</b>  |               | 0  | 0  | 0  | 52 | 0  | 0  | 35 | 0  | 0  | 0  |
| <b>CIP D_Planktonic</b>  |               | 0  | 0  | 0  | 0  | 0  | 0  | 0  | 0  | 0  | 0  |

Table S7. Protease activity measured as the diameter (mm) of the clearing zone on skimmed-milk plates surrounding the inoculation spot of 10 colonies, assessed at 48h as described in (2).

| Lineage                      | Colony number | 1  | 2  | 3  | 4  | 5  | 6  | 7  | 8  | 9  | 10 |
|------------------------------|---------------|----|----|----|----|----|----|----|----|----|----|
| <b>PAO1 initial inoculum</b> |               | 10 | 10 | 10 | -  | -  | -  | -  | -  | -  | -  |
| <b>CTRL A_Biofilm</b>        |               | 0  | 7  | 10 | 7  | 20 | 10 | 10 | 10 | 24 | 12 |
| <b>CTRL B_Biofilm</b>        |               | 0  | 0  | 20 | 0  | 0  | 0  | 0  | 0  | 0  | 0  |
| <b>CTRL C_Biofilm</b>        |               | 0  | 0  | 0  | 0  | 0  | 0  | 0  | 0  | 0  | 0  |
| <b>CTRL D_Biofilm</b>        |               | 9  | 9  | 9  | 11 | 10 | 10 | 9  | 9  | 10 | 10 |



#### Reference List

1. **Lee B, Haagensen JA, Ciofu O, Andersen JB, Hoiby N, and Molin S.** 2005. Heterogeneity of biofilms formed by nonmuroid *Pseudomonas aeruginosa* isolates from patients with cystic fibrosis. *J Clin Microbiol.***43**: 5247-5255.
2. **Wassermann T, Meinike JK, Ivanyshyn K, Bjarnsholt T, Khademi SM, Jelsbak L, Hoiby N, and Ciofu O.** 2016. The phenotypic evolution of *Pseudomonas aeruginosa* populations changes in the presence of subinhibitory concentrations of ciprofloxacin. *Microbiology.***162**: 865-875.
